# Supplementary material for: Functional IKK/NF-κB signaling in pancreatic stellate cells is essential to prevent autoimmune pancreatitis
Source: PubMed Central journal article supplement (PMC9142538; doi:10.1038/s42003-022-03371-3), 2022-05-27
Supplement: 42003_2022_3371_MOESM2_ESM.pdf [file 42003_2022_3371_MOESM2_ESM.pdf]

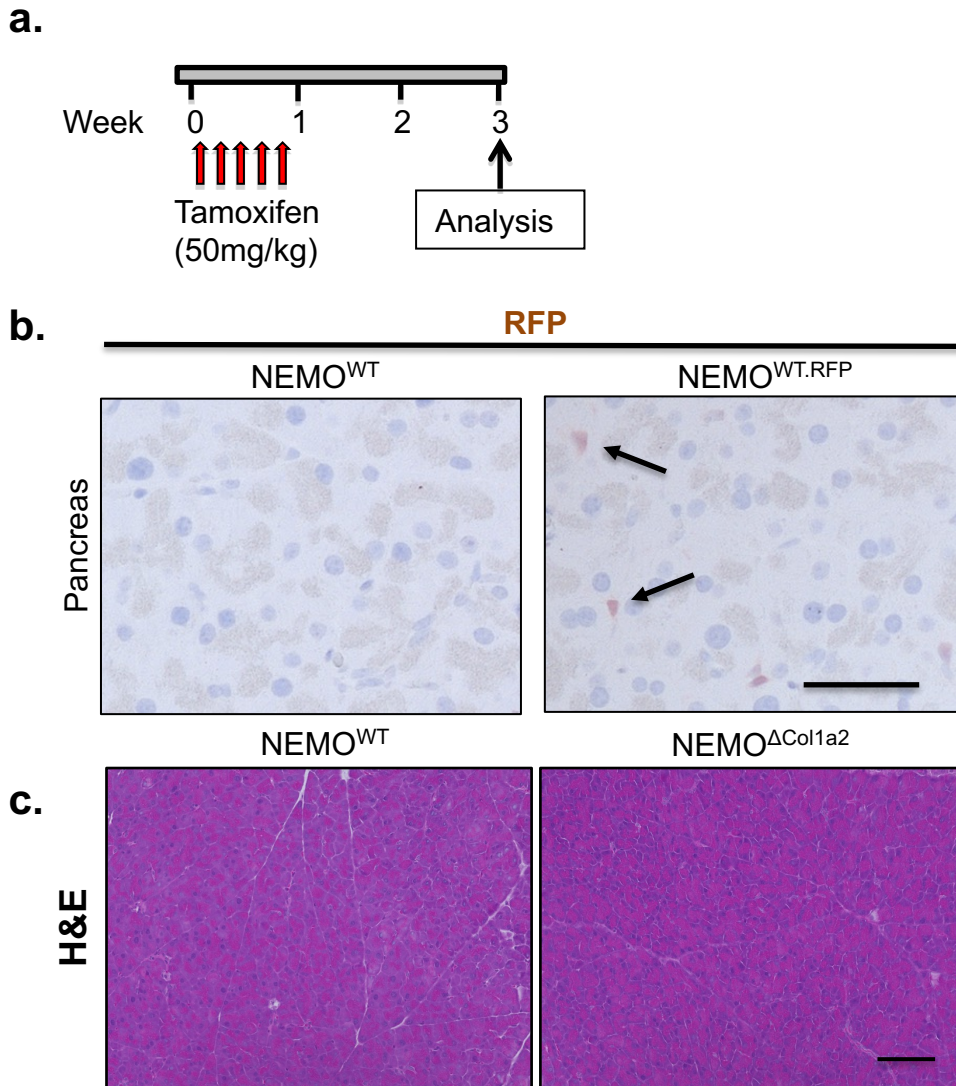

**Supplementary figure 1. Visualization of Cre recombinase activities in the pancreas.** a) Scheme of tamoxifen injection. b) RFP staining showing positive cells (arrow) in the pancreas. Scale bar: 50 $\mu$ m. c) Histology of pancreata 3 weeks after the starting of the first tamoxifen injection. Scale bar: 100 $\mu$ m.

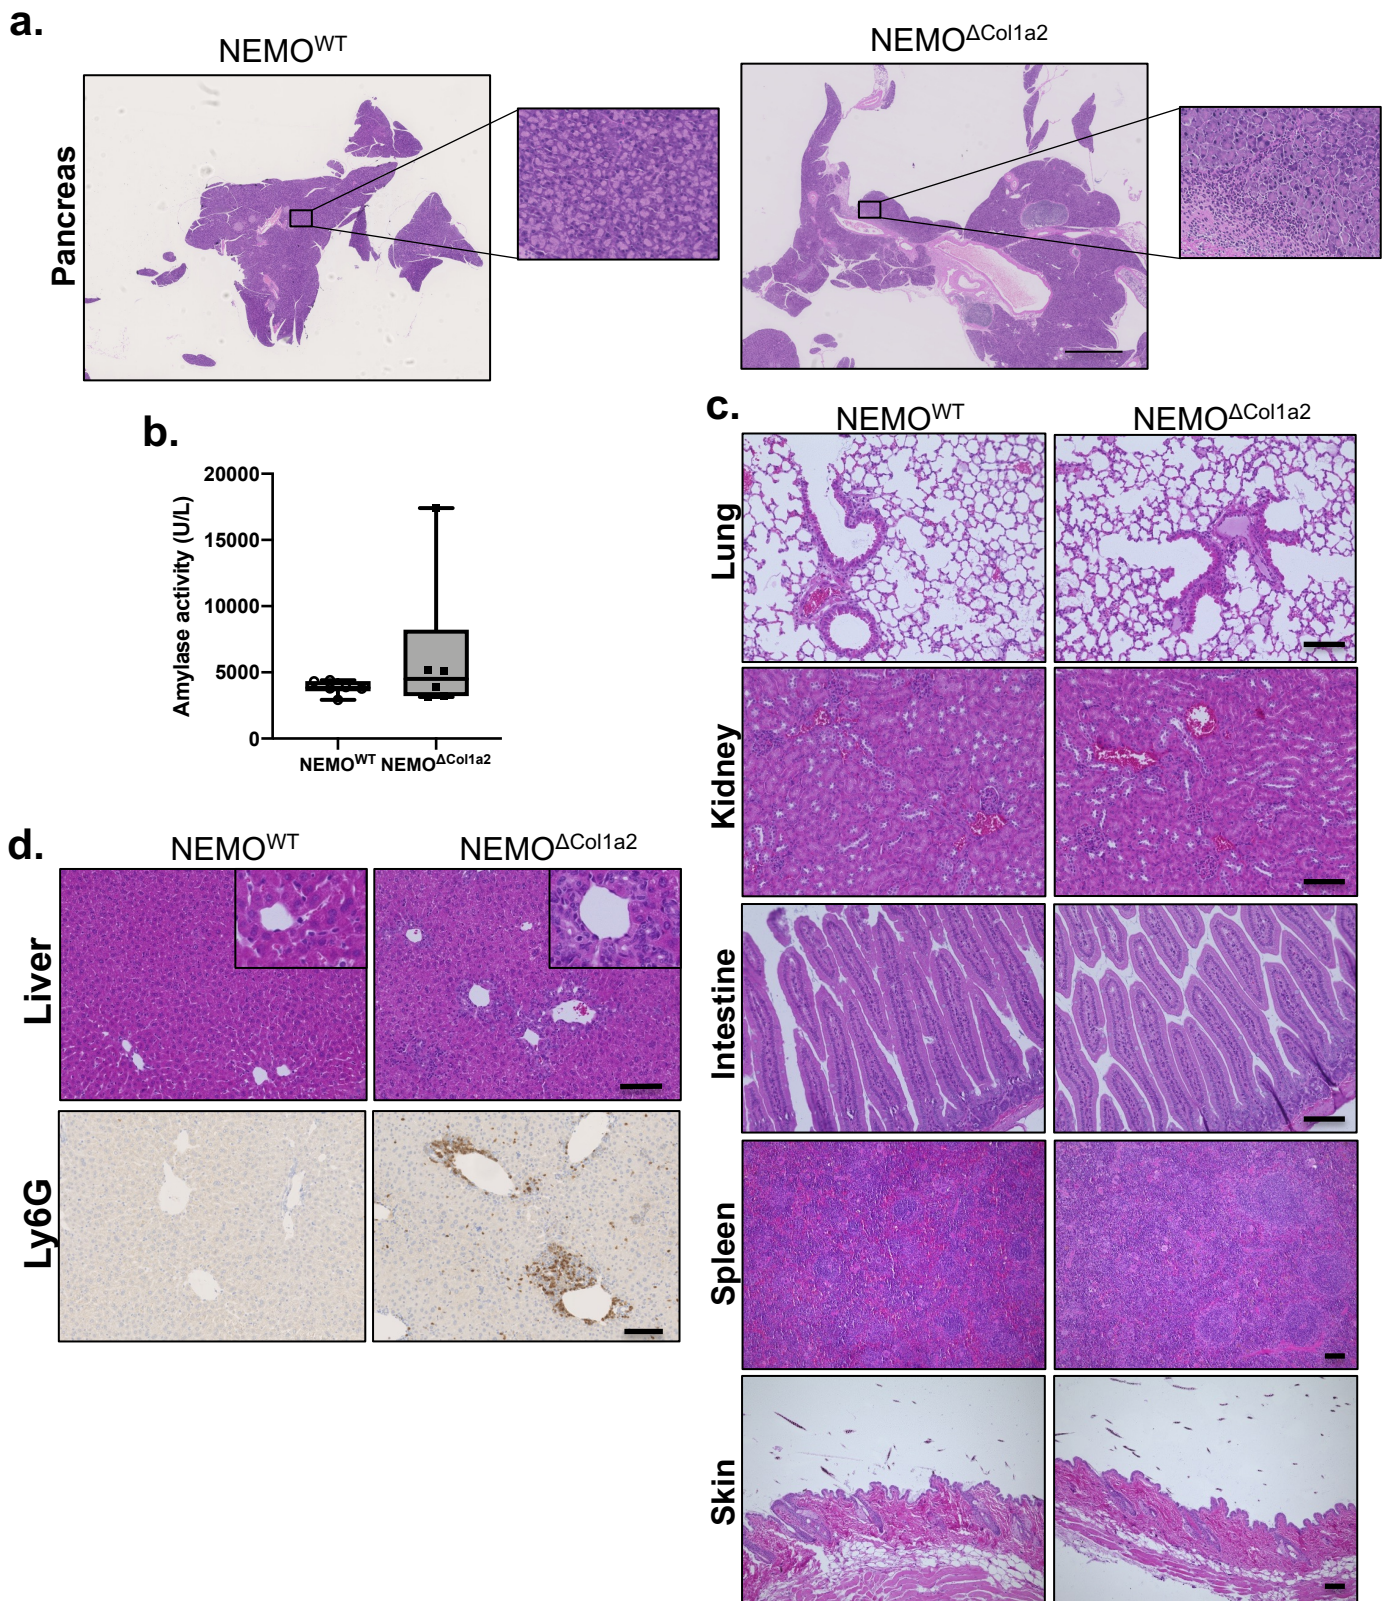

**Supplementary figure 2. Long-term tamoxifen diet induces spontaneous pancreatitis in NEMO<sup>ΔCol1a2</sup> animals.** a) H&E staining of pancreas. Scale bar: 1 mm. b) Amylase activities measured from serum (n=6). c) H&E staining of different organs. Scale bar: 100μm. d) Periportal inflammation in the liver of NEMO<sup>ΔCol1a2</sup> mice. Scale bar: 100μm. The n number represents biological replicates.



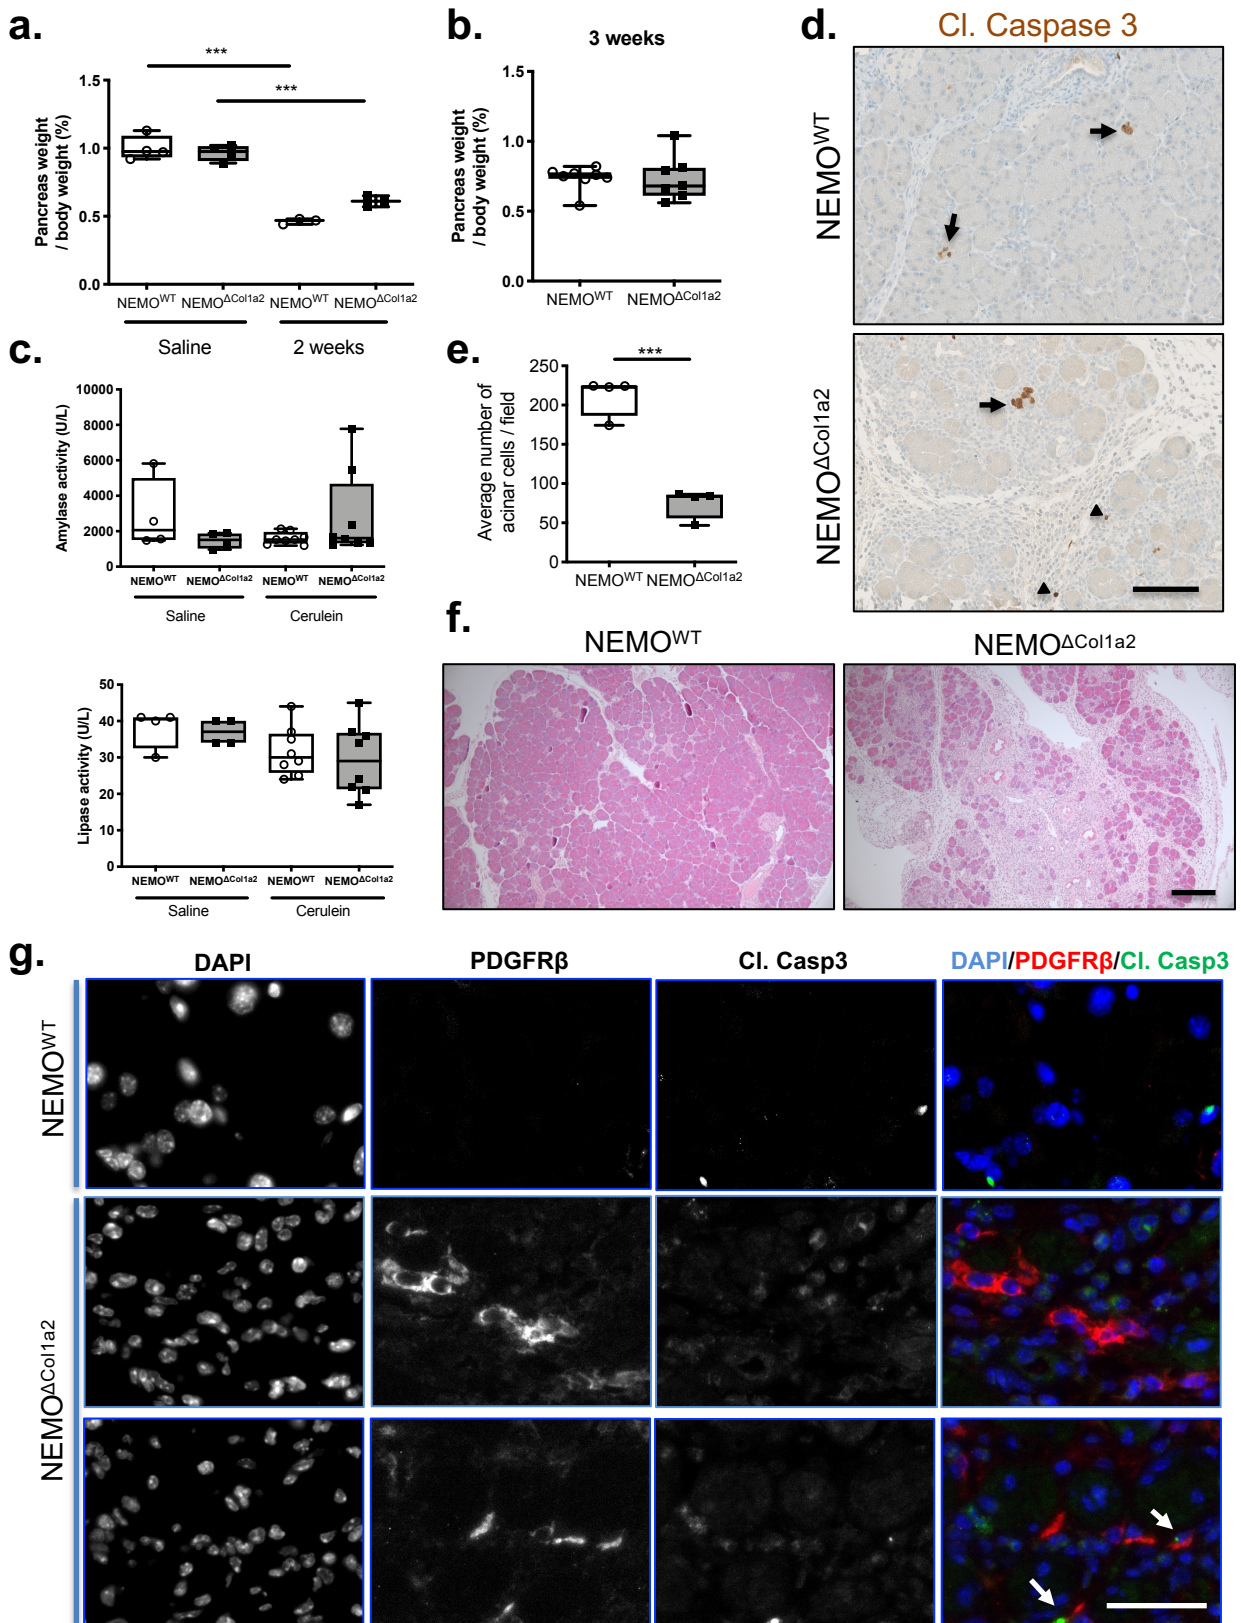

**Supplementary figure 3. Characterization of animals after caerulein and tamoxifen injections.** a) Measurement of the pancreas weight as a ratio of the body weight from the saline- and caerulein-injected animals ( $n \geq 3$ ). b) Ratio of pancreas weight to the body weight from animals at 3 weeks ( $n = 8$ ). c) Amylase and lipase activities measured from serum ( $n \geq 4$ ). d) Cleaved caspase 3 staining indicating the presence of apoptotic cells. Arrow: apoptotic acinar cells; arrow head: apoptotic non-parenchymal cells. Scale bar:  $100 \mu\text{m}$ . e) Quantification of the number of acinar cells per field on pancreas sections (3 week) ( $n = 4$ ). f) Low magnification of pancreas histology. Scale bar:  $200 \mu\text{m}$ . g) Co-staining of PDGFR $\beta$  and cleaved caspase 3 to identify apoptotic PSCs. Arrow: apoptotic PSCs. Scale bar:  $25 \mu\text{m}$ . Whiskers: Min to Max. T-test (two-tailed); \*\*\* $p < 0.001$ . All  $n$  numbers represent biological replicates.

a.

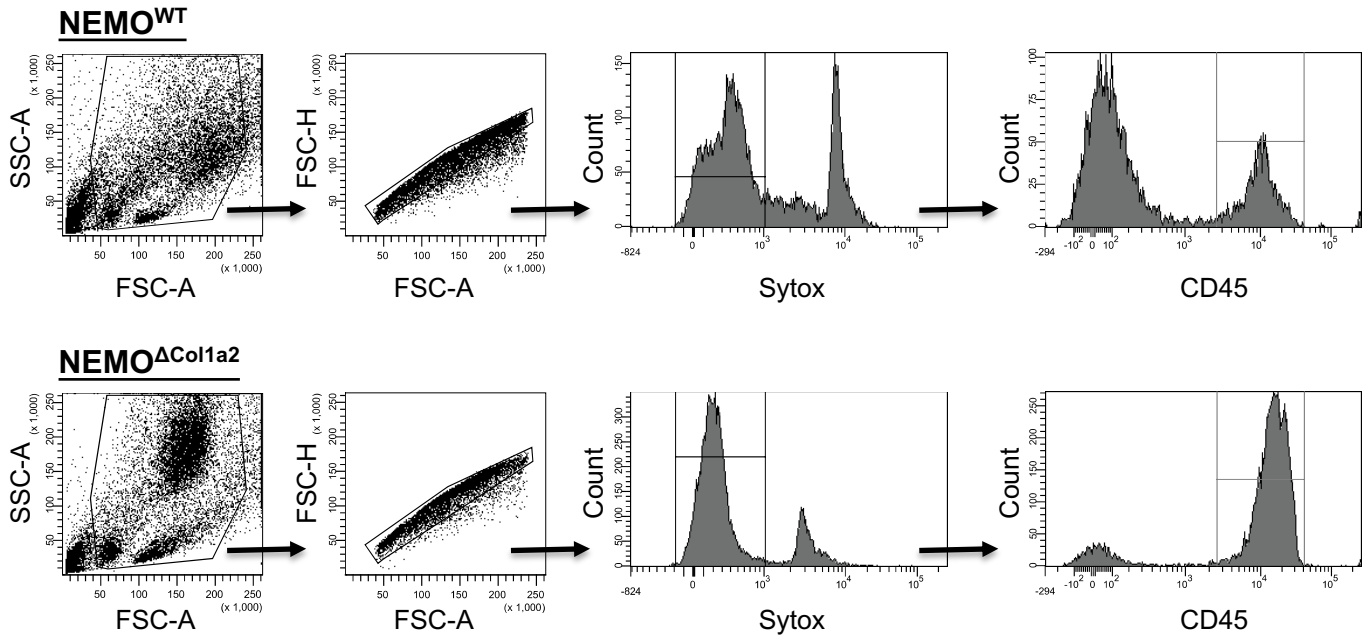

b.

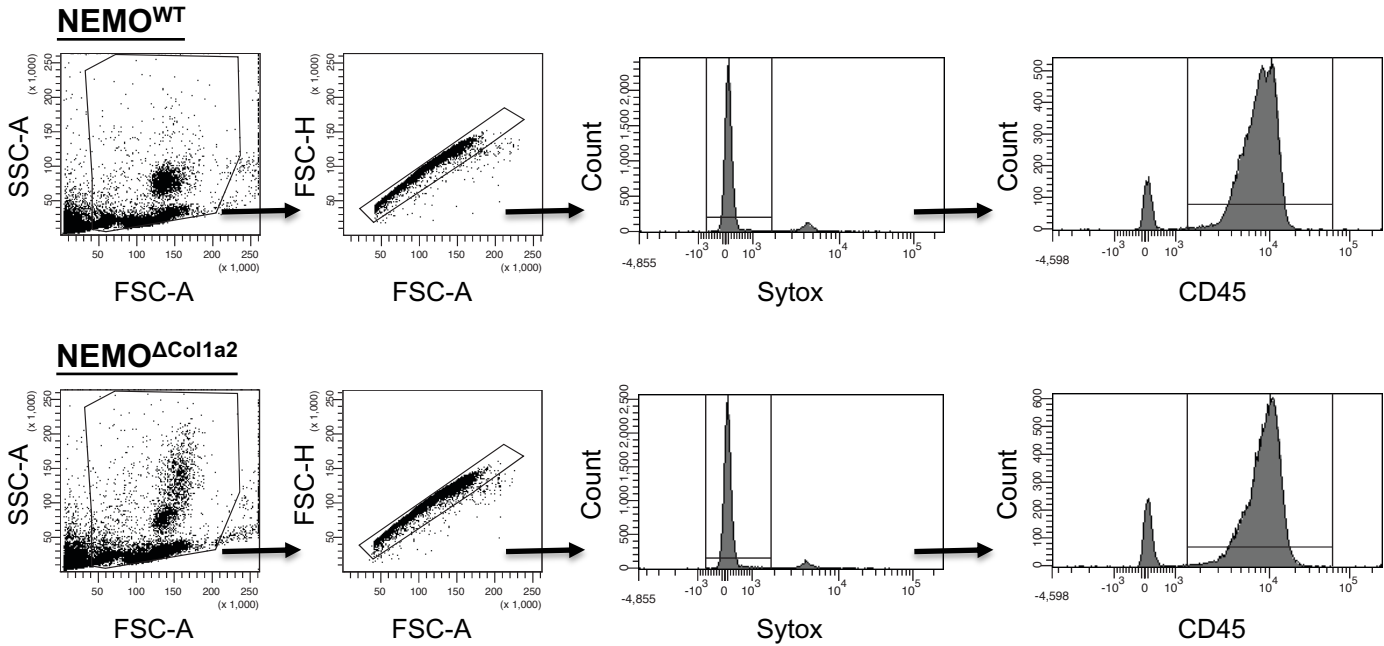

**Supplementary figure 4. FACS analyses on the infiltrating cells from pancreata and immune cells in the peripheral circulation.** Cells were isolated from pancreata (a) using gradient centrifugation or from blood (b) of NEMO<sup>WT</sup> and NEMO<sup>ΔCol1a2</sup> animals .



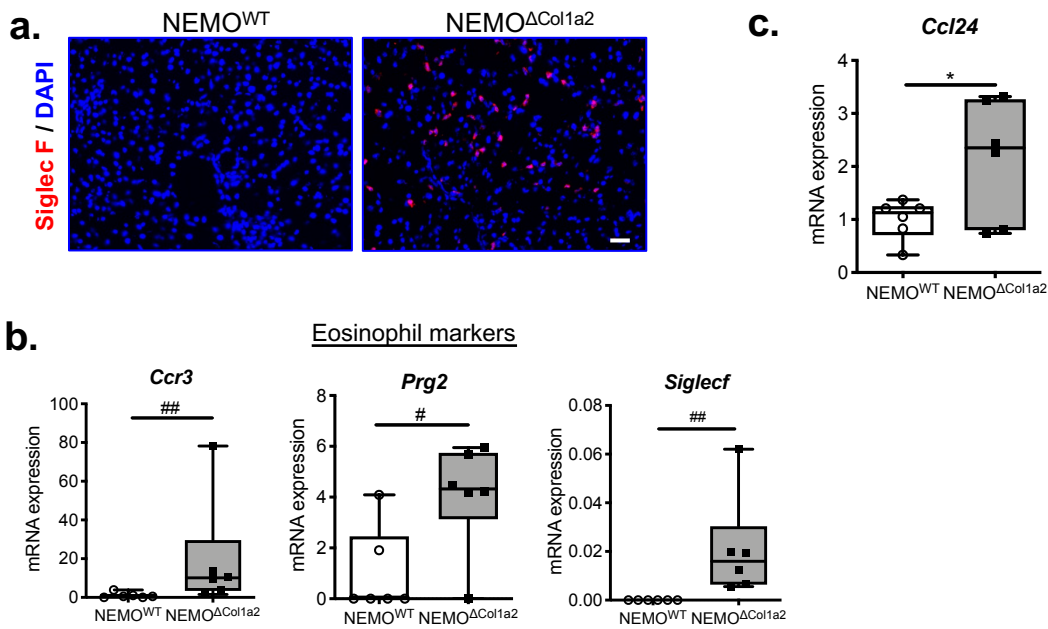

**Supplementary figure 5. Eosinophils are recruited to the pancreas of NEMO<sup>ΔCol1a2</sup> mice after long-term tamoxifen diet.** a) Siglec-F staining showing eosinophil infiltration in the pancreas. DAPI: nuclei. Scale bar: 50μm. b-c) Expression of the chemokine CCL24 and eosinophil markers (CCR3, Siglec-F and PRG2) from pancreatic tissue assessed by qPCR (n=6). Whiskers: Min to Max. Mann-Whitney (two-tailed): #p<0.05; ##p<0.01. T-test (two-tailed): \*p<0.05. The n number represents biological replicates.

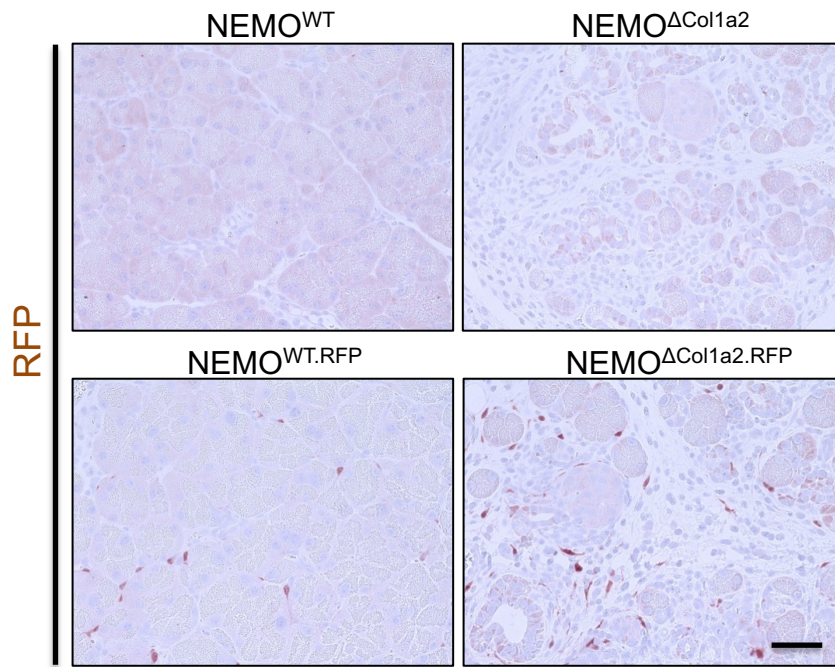

**Supplementary figure 6. Analysis of the RFP reporter mouse lines.** RFP stainings on the  $NEMO^{WT}$ ,  $NEMO^{\Delta Col1a2}$ ,  $NEMO^{WT.RFP}$  and  $NEMO^{\Delta Col1a2.RFP}$  pancreata 3 weeks after caerulein and tamoxifen injections. Scale bar: 50 $\mu$ m.



a.

GSEA in  $NEMO^{\Delta Col1a2}$  animals (vs.  $NEMO^{WT}$ )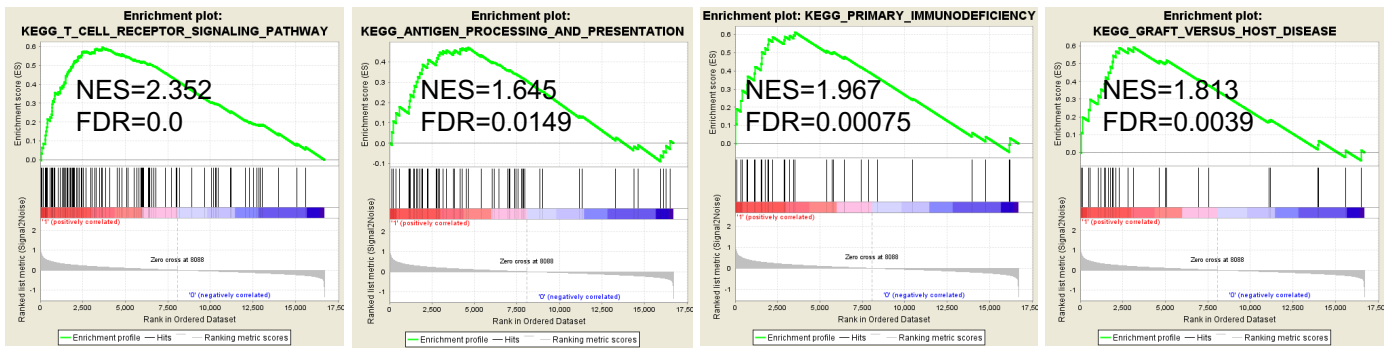

b.

## GSEA in human AIP (vs. alcoholic CP)

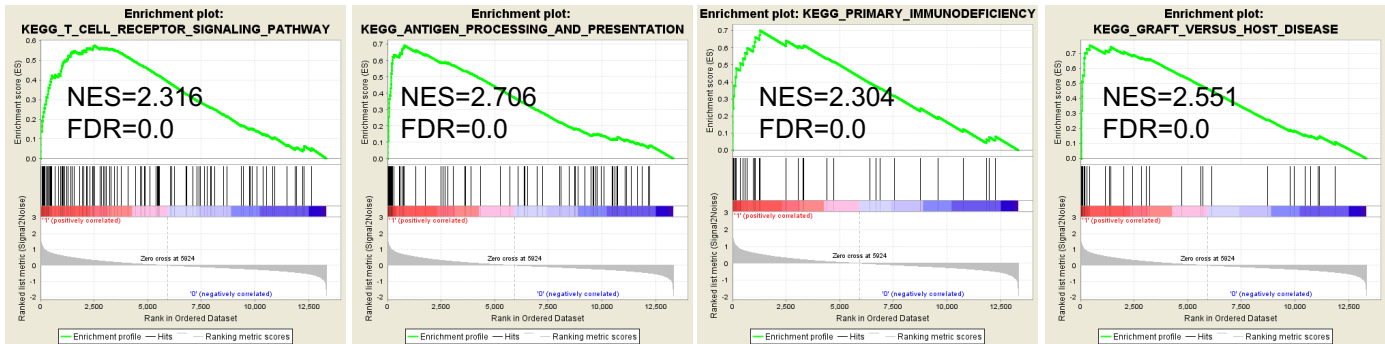

**Supplementary figure 7. Comparison of the gene expression profiles between  $NEMO^{\Delta Col1a2}$  mice and human AIP samples.** DNA microarray performed on the pancreatic samples of  $NEMO^{WT}$  and  $NEMO^{\Delta Col1a2}$  animals collected at the 3-week time point. a) GSEA was performed on the microarray results of the  $NEMO^{\Delta Col1a2}$  group with the  $NEMO^{WT}$  group as a reference (n=3). b) Analysis of microarray data from AIP patients (n=4) using GSEA with AICP patients (n=5) as a reference. NES: Net enrichment score. FDR: False discovery rate.

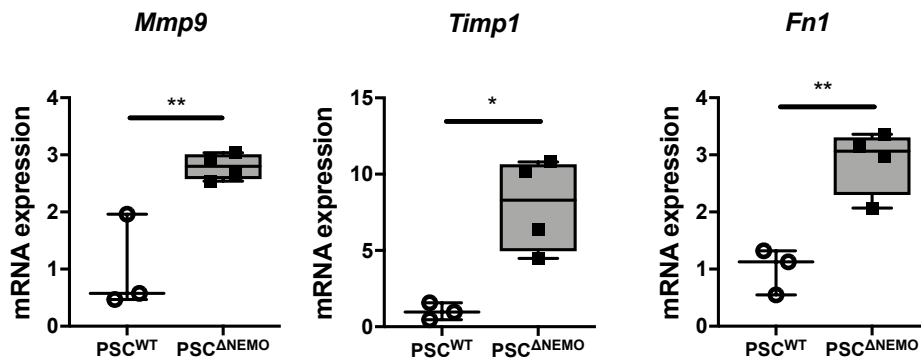

**Supplementary figure 8. PSC<sup>ΔNEMO</sup> cells show upregulation of ECM components.** Expressions of genes involved in ECM modifications in PSCs analyzed by qPCR (n≥3). Whiskers: Min to Max. T-test (two-tailed): \*p<0.05; \*\*p<0.01. The n number represents biological replicates.



Supplementary figure 9. Original Western blot images

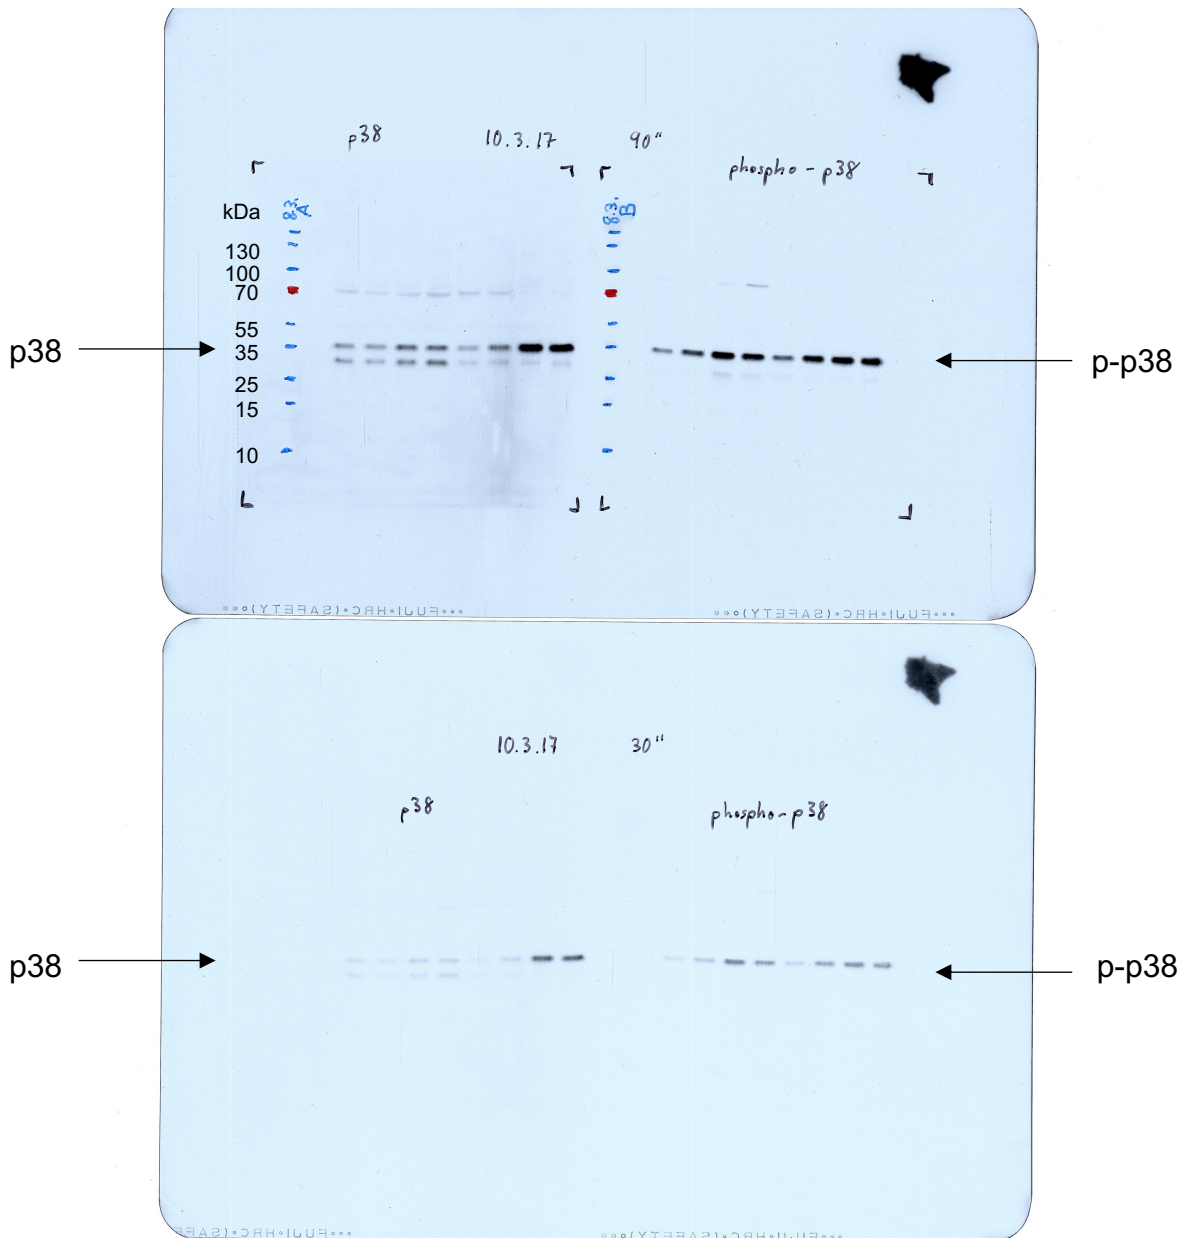

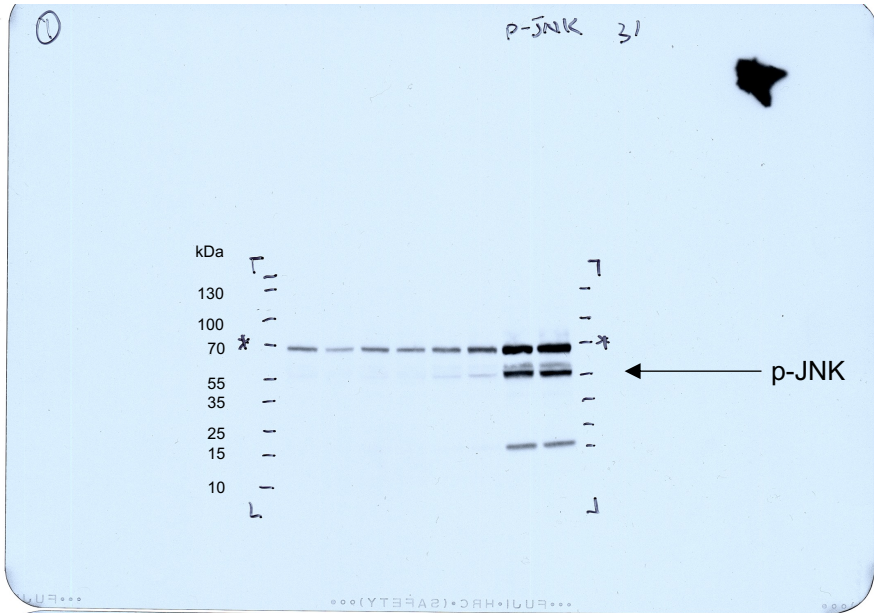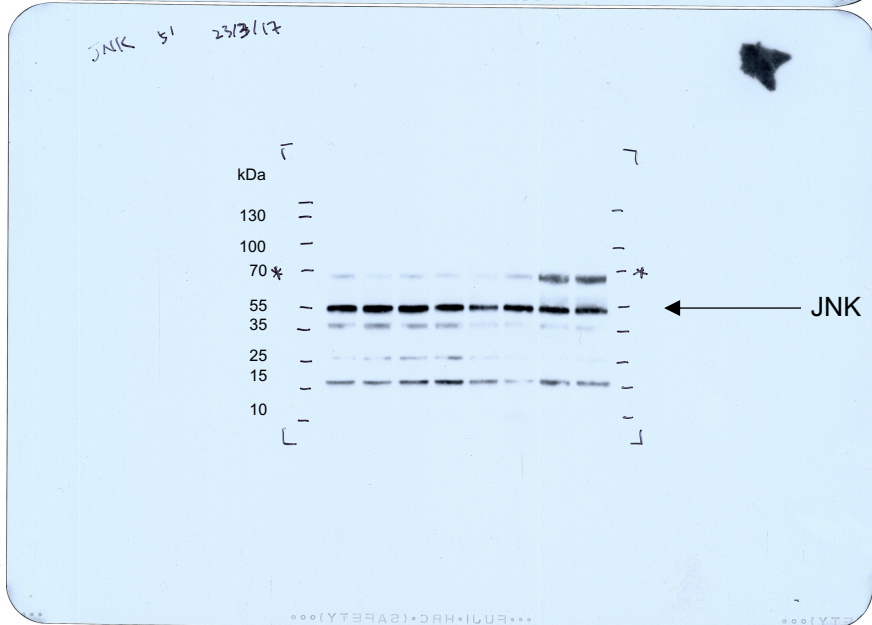



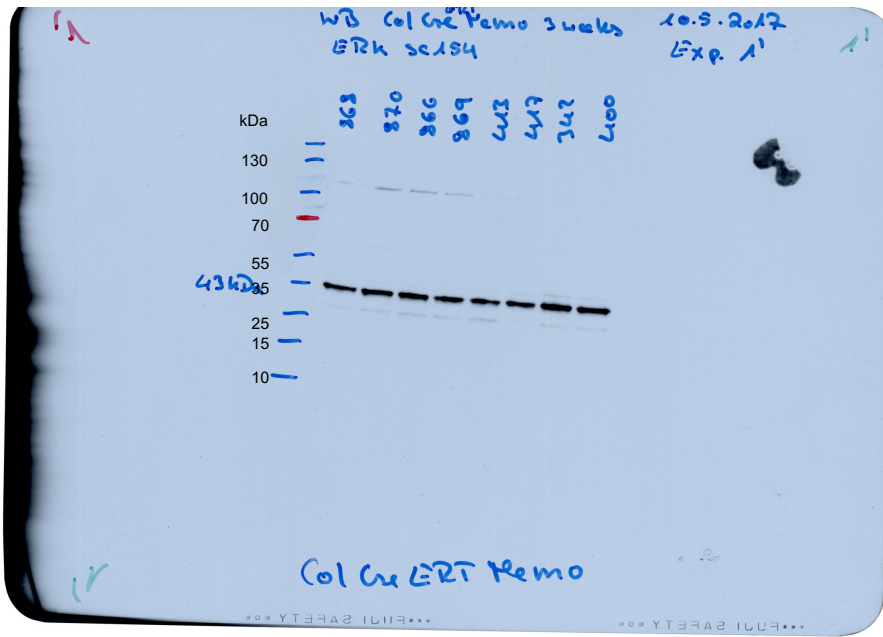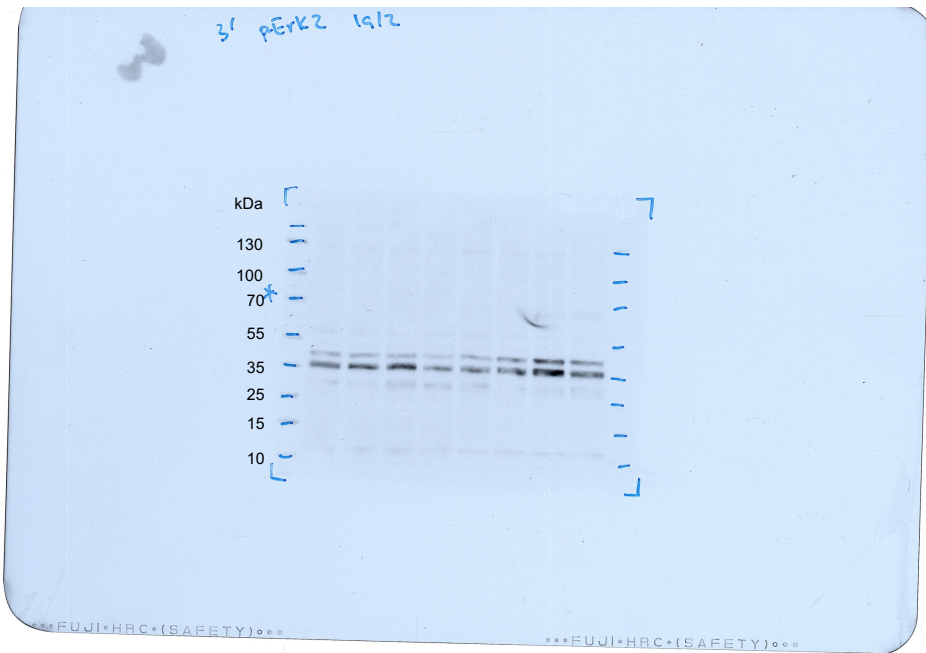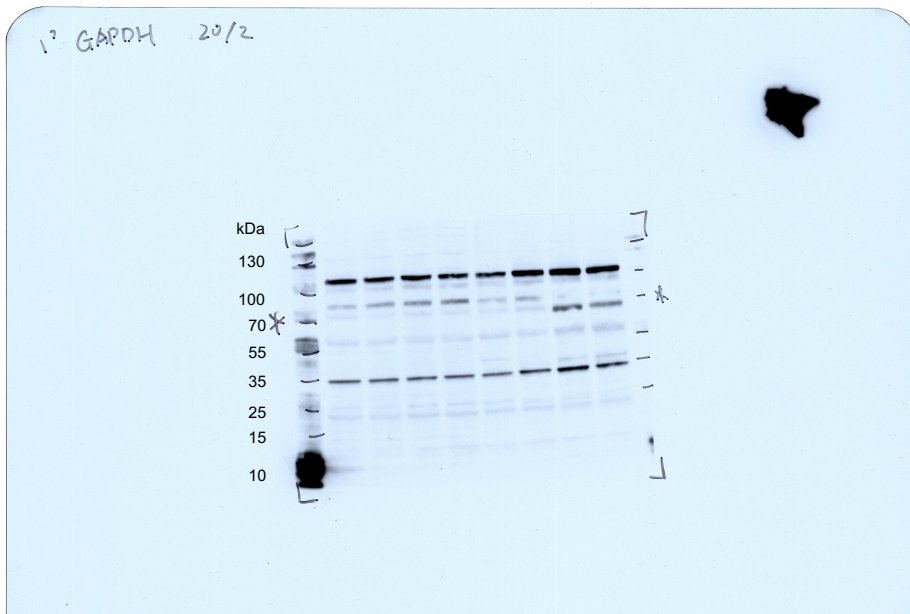

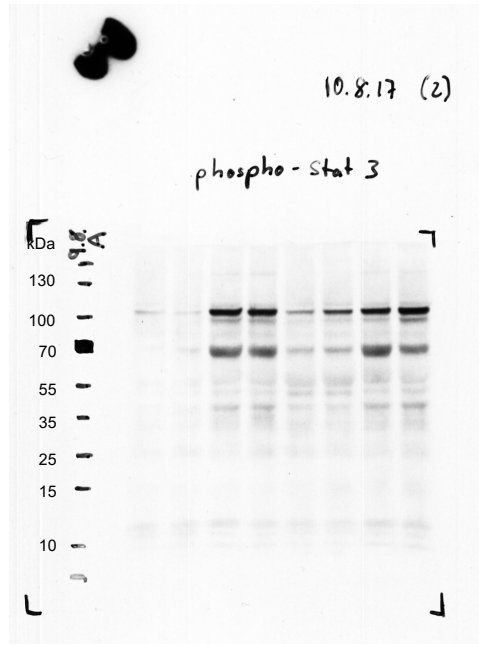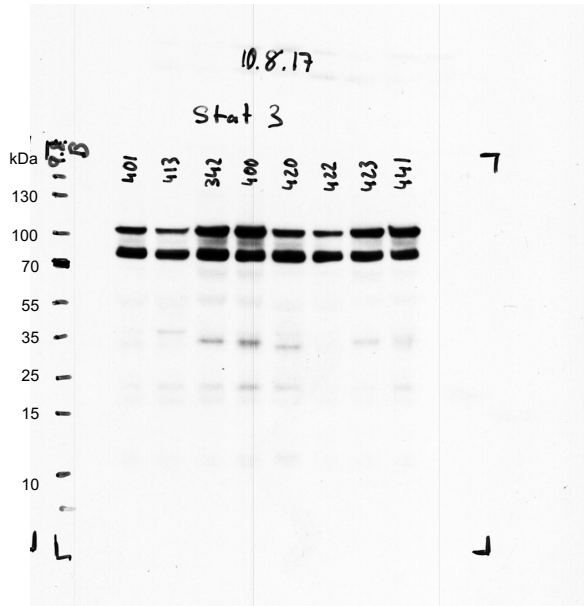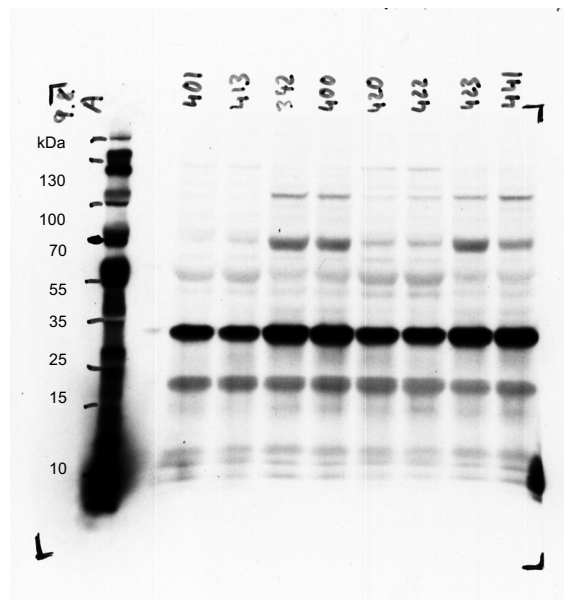



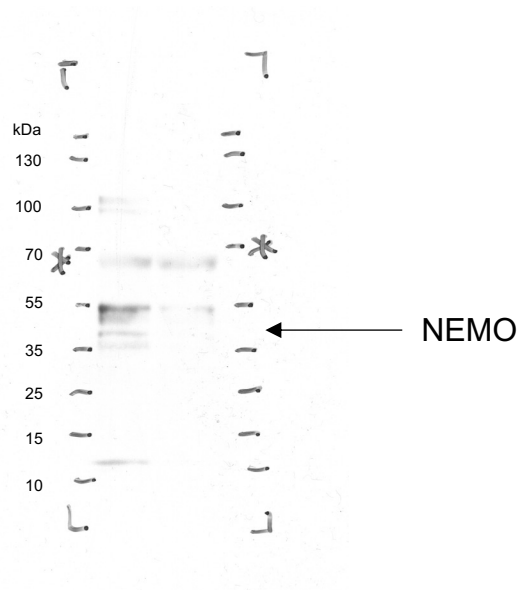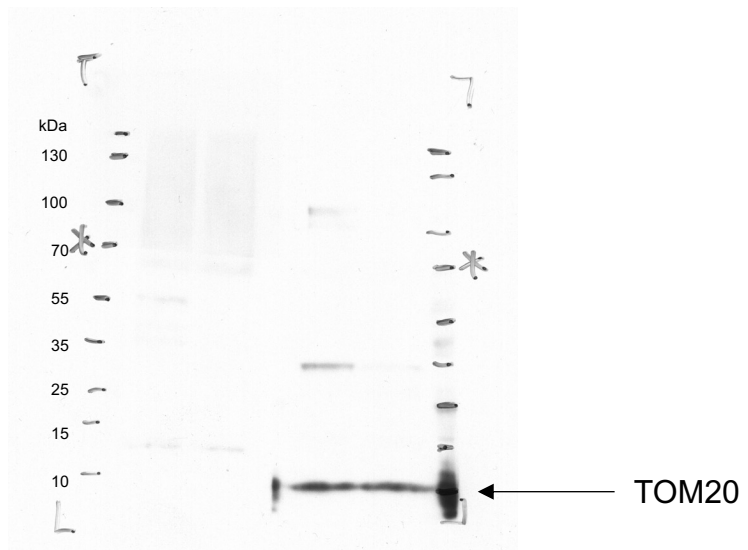

## Supplementary Tables

| Primary antibody               | Dilutions | Company                       |
|--------------------------------|-----------|-------------------------------|
| rabbit anti- $\alpha$ -amylase | 1:400     | Sigma (A8273)                 |
| goat anti-CK19                 | 1:100     | Santa Cruz (sc-33111)         |
| rat anti-CD45                  | 1:100     | BD Pharmingen (#550539)       |
| mouse anti- $\alpha$ SMA       | 1:100     | Millipore (CBL171)            |
| rabbit anti-RFP                | 1:100     | Rockland (600-401-379)        |
| rat anti-B220                  | 1:100     | BioLegend (103247)            |
| rat anti-CD3                   | 1:100     | BioLegend (100201)            |
| rat anti-CD4                   | 1:100     | BD Pharmingen (550278)        |
| rat anti-CD8                   | 1:100     | BD Pharmingen (550281)        |
| rabbit anti-vimentin           | 1:100     | abcam (ab7783)                |
| rat anti-SiglecF               | 1:100     | Miltenyi Biotec (130-102-167) |
| goat anti-nestin               | 1:100     | Santa Cruz (sc-21248)         |

**Supplementary table 1.** List of primary antibodies for histological staining.

| Antibody                | Dilutions | Company                  |
|-------------------------|-----------|--------------------------|
| CD11c (BV510)           | 1:100     | BioLegend (117337)       |
| CD11b (APC)             | 1:100     | BioLegend (101212)       |
| CD45 (APC/Cy7)          | 1:400     | BD Pharmingen (557659)   |
| Ly6G (BV421)            | 1:100     | BioLegend (127627)       |
| CCR3 (PerCP)            | 1:100     | R&D System (FAB729C-025) |
| SiglecF (PE-Vio770)     | 1:25      | MACS (130-102-167)       |
| CD4 (FITC)              | 1:100     | MACS (120-001-955)       |
| CD4 (PE)                | 1:100     | BioLegend (100407)       |
| IL17A (APC)             | 1:50      | MACS (130-103-027)       |
| F4/80 (AF448)           | 1:50      | Bio-Rad (MCA497A448T)    |
| CD3 $\epsilon$ (PE/Cy7) | 1:100     | BioLegend (100320)       |

**Supplementary table 2.** List of antibodies for flow cytometry.

| Primary antibodies | Dilutions | Company                                |
|--------------------|-----------|----------------------------------------|
| NEMO               | 1:1000    | BD Transduction Laboratories (#611306) |
| GAPDH              | 1:1000    | Santa Cruz (sc-25778)                  |
| TOM20              | 1:1000    | Santa Cruz (sc-11415)                  |
| p-JNK              | 1:1000    | Cell Signaling (9255S)                 |
| JNK                | 1:1000    | Santa Cruz (sc-7345)                   |
| p-p38              | 1:1000    | Cell Signaling (9211S)                 |
| p38                | 1:1000    | Cell Signaling (9212)                  |
| p-ERK              | 1:1000    | Cell Signaling (4377)                  |
| ERK2               | 1:1000    | Santa Cruz (sc-154)                    |

|         |        |                        |
|---------|--------|------------------------|
| p-STAT3 | 1:1000 | Cell Signaling (9145S) |
| STAT3   | 1:1000 | Cell Signaling (4904S) |

**Supplementary table 3.** List of antibodies for western blot.

| <b>Gene</b>   | <b>Primer Sequence</b>                                               | <b>Gene</b>    | <b>Primer Sequence</b>                                        |
|---------------|----------------------------------------------------------------------|----------------|---------------------------------------------------------------|
| <i>Col1a1</i> | F 5' catgttcagctttgtggacct 3'<br>R 5' gcagctgacttcagggatgt 3'        | <i>Icam1</i>   | F 5' cccacgctacctctgctc 3'<br>R 5' gatggatacctgagcatcacc 3'   |
| <i>Col1a2</i> | F 5' agggcctgatggaacaag 3'<br>R 5' cccctctctctggaagc 3'              | <i>Nfkbia</i>  | F 5' cagaacaacctgcagcagac 3'<br>R 5' ttcagaagtgcctcagcaat 3'  |
| <i>Col3a1</i> | F 5' tccctggaatctgtgaatc 3'<br>R 5' tgagtccaattggggagaat 3'          | <i>Ccl6</i>    | F 5' tctttatccttggtgctgcc 3'<br>R 5' tggagggttatagcgacgat 3'  |
| <i>Vim</i>    | F 5' gtaccggagacaggtgcagt 3'<br>R 5' ttctctccatctcacgcac 3'          | <i>Ccl8</i>    | F 5' tcagcccagagaagetgac 3'<br>R 5' ggggatcttcagcttagtaca 3'  |
| <i>Cxcr4</i>  | F 5' tggaaccgatcagtgtagt 3'<br>R 5' gggcaggaagatcctattga 3'          | <i>Ccl9</i>    | F 5' ggctgctcaggttactgt 3'<br>R 5' agaacgatagggcggtaggt 3'    |
| <i>Fnl1</i>   | F 5' gatccgatcagaagtttg 3'<br>R 5' ggttgtgcagatctcctct 3'            | <i>Hprt</i>    | F 5' ggagcggtagcacctct 3'<br>R 5' cctggttcatcatcgtaatc 3'     |
| <i>Tgfb1</i>  | F 5' tggagcaacatgtggaactc 3'<br>R 5' gtcagcagccggttacc 3'            | <i>Ccl11</i>   | F 5' agagctccacagcgttct 3'<br>R 5' gcaggaagttgggatgga 3'      |
| <i>Rpl13</i>  | F 5' cctgctctcaaggtgt 3'<br>R 5' ggtactccaccgacctc 3'                | <i>Ccl12</i>   | F 5' ccatcagctcctcaggtattg 3'<br>R 5' ctccggagctgaattctt 3'   |
| <i>Il6</i>    | F 5' gctacaaactggatataatcagga 3'<br>R 5' ccaggtagctatggtactccagaa 3' | <i>Ccl24</i>   | F 5' gtgctgacctccagaacat 3'<br>R 5' gaggggatggtcacagaatc 3'   |
| <i>Prg2</i>   | F 5' ggagcgtctgctcttcatct 3'<br>R 5' ccctggaggacactcttct 3'          | <i>Ccr2</i>    | F 5' acctgtaaatgccatgcaagt 3'<br>R 5' tgtctccattctcttgattg 3' |
| <i>Ifng</i>   | F 5' atctggaggaactggcaaaa3'<br>R 5' ttcaagactcaaagagtctgagg 3'       | <i>Ccr3</i>    | F 5' gaatcaaagagctggggtca 3'<br>R 5' caggaggccgatgatgaa 3'    |
| <i>Il12a</i>  | F 5' ccaggtgtcttagccagtc 3'<br>R 5' gcagtgcaggaataatgttca 3'         | <i>Siglecf</i> | F 5' gaactacctggcactggtgtt 3'<br>R 5' gctccactctgcaggacttt 3' |
| <i>Il4</i>    | F 5' cctgctctcttctcgaatgt 3'<br>R 5' cacatccatctccgtgcat 3'          | <i>Ikbkg</i>   | F 5' ctgcttcaagtcaccaag 3'<br>R 5' gtgtaaacgaccaccagt 3'      |
| <i>Il5</i>    | F 5' acattgaccgcaaaaagag 3'<br>R 5' atccaggaactgcctcgtc 3'           | <i>Cpa1</i>    | F 5' agcagctctcggaatgag 3'<br>R 5' cagaagtccaactcaagtgctc 3'  |
| <i>Il17</i>   | F 5' ggacagccctctttgtctg 3'<br>R 5' tgcttttatattcattacgtggtt 3'      |                |                                                               |

**Supplementary table 4.** List of primers for qPCR.
