# Supplementary material for: Functional IKK/NF-κB signaling in pancreatic stellate cells is essential to prevent autoimmune pancreatitis
Source: PubMed Central journal article supplement (PMC9142538; doi:10.1038/s42003-022-03371-3), 2022-05-27
Supplement: 42003_2022_3371_MOESM3_ESM.pdf [file 42003_2022_3371_MOESM3_ESM.pdf]

## Description of Additional Supplementary Files

**File name:** Supplementary Data 1

**Description:** All raw data used in plotting graphs.
